# Supplementary material
Source: PubMed Central journal article supplement (PMC6371403)
Supplement: NIHMS1505609-supplement-1.pdf [file NIHMS1505609-supplement-1.pdf]

## Supplementary Table 1

### List of primers

| <b>Osteogenic primers</b> | <b>Assay #</b> |
|---------------------------|----------------|
| RUNX2                     | Hs01047973_m1  |
| Osterix                   | Hs01866874_s1  |
| OC                        | Hs01587814_g1  |
| OPN                       | Hs00959010_m1  |
| <b>Adipogenic primers</b> | <b>Assay #</b> |
| C/EBPa                    | Hs00269972_s1  |
| LPL                       | Hs00173425_m1  |
| PPARg                     | Hs01115513_m1  |
| ADPN                      | Hs00605917_m1  |
| <b>miRNA</b>              | <b>Assay #</b> |
| hsa-miR-34a               | 478048_mir     |
| hsa-miR-27a               | 477998_mir     |
| hsa-miR-22                | 477985_mir     |
| hsa-miR-143               | 478713_mir     |
| hsa-miR-375               | 478074_mir     |
| hsa-miR-10a               | 479241_mir     |
| U6 snRNA                  | 1973           |

### List of antibodies

| <b>Antibody</b>                       | <b>Company</b>          |
|---------------------------------------|-------------------------|
| CD9 Antibody (C-4): sc-13118          | Santa Cruz              |
| CD63 Antibody (H-193): sc-15363       | Santa Cruz              |
| TSG 101 Antibody (C-2): sc-7964       | Santa Cruz              |
| Tubulin Antibody (B-7): sc-5286       | Santa Cruz              |
| Actin Antibody (C4): sc-47778         | Santa Cruz              |
| Anti-Hsp90 antibody (ab13495)         | Abcam                   |
| Anti-RUNX2 antibody (ab23981)         | Abcam                   |
| OSX Antibody (F-3): sc-393325         | Santa Cruz              |
| PPAR gamma Antibody (PA3-821A)        | ThermoFisher Scientific |
| C/EBP alpha Antibody (D-5): sc-365318 | Santa Cruz              |

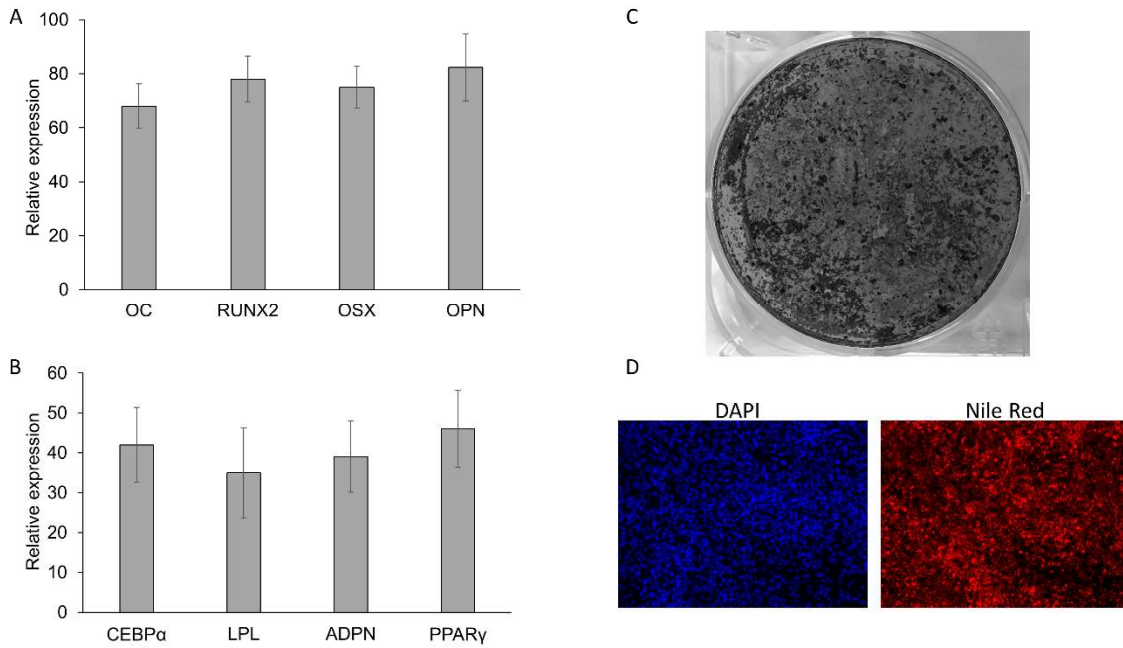

**Supplementary Figure 1:**

Normal human osteoblasts (NHO) and pre-adipocytes were differentiated either into osteoblasts or adipocytes with respective differentiation medium. Relative fold expression of osteogenic (A) and adiogenic (B) genes were calculated with undifferentiated hMSCs as 1 fold expression. Upon differentiation into osteoblasts, the deposition of calcium phosphate was confirmed by vonKossa staining (C). Presence of lipid droplets were detected by Nile Red staining together with nuclear staining by DAPI (D)

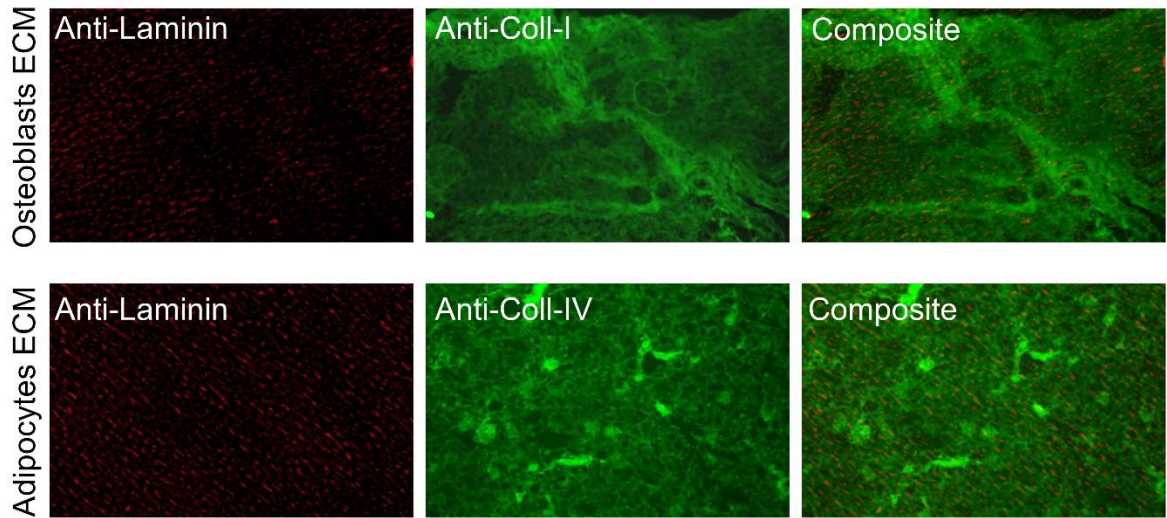

**Supplementary Figure 2:**

The cell-secreted ECM from partially differentiated osteoblasts and adipocytes were immunostained with antibodies against laminin, collagens type-I and type-IV.

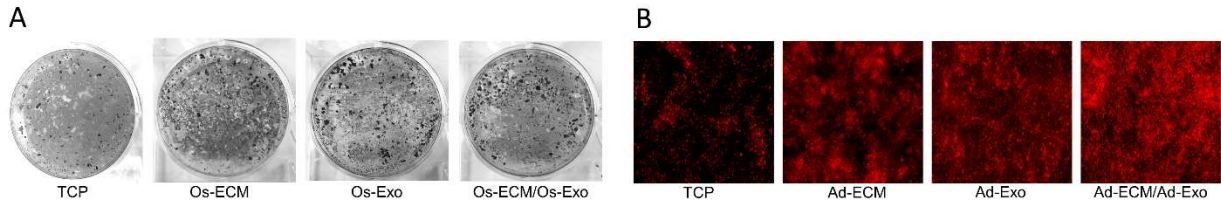

### Supplementary Figure 3:

The human mesenchymal stem cells (hMSCs) were differentiated on either tissue culture plate (TCP) or extracellular matrix (ECM). During osteogenic differentiation on osteoblast ECM (Os-ECM), the cells were also supplemented and differentiated in the presence of osteoblast exosomes (Os-ECM/Os-Exo). The calcium deposition was visualized using von Kossa staining (A). During adipogenic differentiation on adipocyte ECM (Ad-ECM), the cells were also supplemented and differentiated in the presence of adipocyte exosomes (Ad-ECM/Ad-Exo). Lipid droplets were visualized using Nile Red (B).

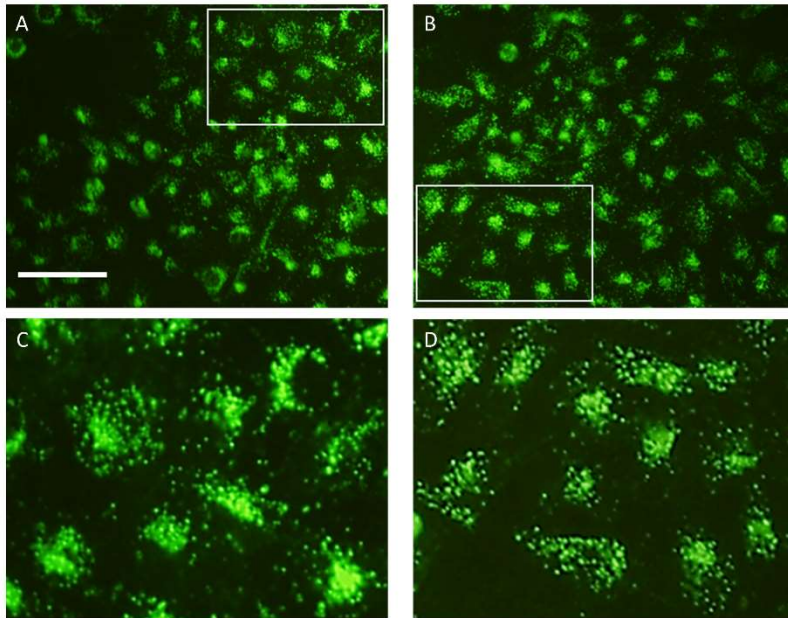

**Supplementary Figure 4:**

**Exosome uptake in human mesenchymal stem cells.** Adhered human mesenchymal stem cells (hMSCs) were incubated with either labeled osteoblast exosomes for 24 h, as described in Materials and Methods section. Exosomes were isolated from either differentiated osteoblasts (A) or differentiated adipocytes (B). Following incubation, the cells were washed with PBS, fixed with paraformaldehyde and visualized under fluorescent microscope. Figure (C) and (D) represent labeled exosomes visualized under higher magnification of the boxed area from (A) and (B), respectively. Scale bar = 200  $\mu\text{m}$ .

Figure 5A

|               | OC       | RUNX2     | OSX      | OPN      |
|---------------|----------|-----------|----------|----------|
| TCP           | 175 ± 56 | 150 ± 43  | 110 ± 53 | 95 ± 35  |
| Os-ECM        | 355 ± 65 | 255 ± 55  | 215 ± 45 | 221 ± 28 |
| Os-Exo        | 450 ± 82 | 280 ± 81  | 220 ± 72 | 380 ± 81 |
| Os-ECM+Os-Exo | 750 ± 90 | 550 ± 100 | 450 ± 80 | 650 ± 93 |

Figure 5B

|               | C/EBP $\alpha$ | LPL       | ADPN     | PPAR $\gamma$ |
|---------------|----------------|-----------|----------|---------------|
| TCP           | 95 ± 35        | 76 ± 32   | 72 ± 25  | 60 ± 15       |
| Ad-ECM        | 290 ± 25       | 272 ± 28  | 170 ± 21 | 265 ± 22      |
| Ad-Exo        | 430 ± 93       | 300 ± 62  | 350 ± 58 | 370 ± 62      |
| Ad-ECM+Ad-Exo | 650 ± 109      | 450 ± 108 | 460 ± 99 | 650 ± 104     |

Figure 8A and 8B

|                 | OC      | RUNX2      | OSX         | C/EBP $\alpha$ | ADPN       | PPAR $\gamma$ |
|-----------------|---------|------------|-------------|----------------|------------|---------------|
| Os-ECM          | 4 ± 1.5 | 3 ± 0.84   | 2.5 ± 0.87  | 0.15 ± 0.15    | 0.1 ± 0.16 | 0.17 ± 0.09   |
| Os-ECM + Os-Exo | 17 ± 4  | 7 ± 1.5    | 10 ± 2.7    | 0.12 ± 0.12    | 0.14 ± 0.1 | 0.15 ± 0.09   |
| Os-ECM + Ad-Exo | 5 ± 3.5 | 2.5 ± 0.98 | 2.12 ± 0.84 | 2.9 ± 0.5      | 2.1 ± 0.6  | 1.8 ± 0.6     |

Figure 8C and 8D

|                 |             |             |             |            |            |            |
|-----------------|-------------|-------------|-------------|------------|------------|------------|
| Ad-ECM          | 0.18 ± 0.09 | 0.13 ± 0.09 | 0.12 ± 0.08 | 6 ± 1.5    | 5 ± 0.64   | 3.8 ± 0.67 |
| Ad-ECM + Ad-Exo | 0.17 ± 0.11 | 0.12 ± 0.09 | 0.13 ± 0.07 | 9.5 ± 1.85 | 7.4 ± 1.91 | 7.8 ± 1.61 |
| Ad-ECM + Os-Exo | 1.5 ± 0.65  | 2.2 ± 0.78  | 2.1 ± 0.45  | 2.9 ± 0.86 | 4 ± 1.1    | 3.5 ± 0.87 |

## Supplementary Table 2:

Values associated to the fold changes of gene expression presented in Figure 5 and 8 are given in the table
